# Supplementary material for: TERT Polymorphism rs2853669 Influences on Lung Cancer Risk in the Korean Population
Source: PubMed Central journal article supplement — J Korean Med Sci. 2015 Sep 12;30(10):1423–8. doi: 10.3346/jkms.2015.30.10.1423 (PMC4575930; doi:10.3346/jkms.2015.30.10.1423), 2015-09-12
Supplement: jkms-30-1423-s001.pdf [file jkms-30-1423-s001.pdf]

**Supplementary Table 1.** Locations and minor allele frequencies of polymorphisms

| Polymorphism | Gene          | Region   | Minor allele | Call rates (%) |          | MAF    |      |      |
|--------------|---------------|----------|--------------|----------------|----------|--------|------|------|
|              |               |          |              | Cases          | Controls | Korean | JPT* | CEU* |
| rs2853669    | <i>TERT</i>   | Promoter | C            | 99.3           | 98.5     | 0.37   | -    | 0.38 |
| rs2736108    | <i>TERT</i>   | Promoter | A            | 98.3           | 97.3     | 0.26   | 0.17 | 0.35 |
| rs2736098    | <i>TERT</i>   | Exon2    | A            | 99.5           | 96.4     | 0.37   | 0.25 | 0.37 |
| rs7705526    | <i>TERT</i>   | Intron   | A            | 96.0           | 96.1     | 0.36   | -    | 0.50 |
| rs2293607    | <i>TERC</i>   | 3' UTR   | A            | 97.8           | 96.1     | 0.40   | 0.33 | 0.75 |
| rs412658     | <i>ZNF676</i> | 3' UTR   | T            | 95.1           | 95.2     | 0.44   | 0.33 | 0.33 |

\*Data from NCBI (<http://www.ncbi.nlm.nih.gov/SNP>). MAF, minor allele frequency; UTR, untranslated region.
