# Supplementary material for: TERT Polymorphism rs2853669 Influences on Lung Cancer Risk in the Korean Population
Source: PubMed Central journal article supplement — J Korean Med Sci. 2015 Sep 12;30(10):1423–8. doi: 10.3346/jkms.2015.30.10.1423 (PMC4575930; doi:10.3346/jkms.2015.30.10.1423), 2015-09-12
Supplement: jkms-30-1423-s002.pdf [file jkms-30-1423-s002.pdf]

**Supplementary Table 2.** Stratified and interaction analysis between rs2853669 and smoking status associated with lung cancer risk

| Genotype                                     | Smoking status |                  |                                          |                |                  |                      |
|----------------------------------------------|----------------|------------------|------------------------------------------|----------------|------------------|----------------------|
|                                              | Nonsmokers     |                  |                                          | Smokers        |                  |                      |
|                                              | Cases/Controls | OR (95% CI)*     | <i>P</i>                                 | Cases/Controls | OR (95% CI) *    | <i>P</i>             |
| TT + TC                                      | 264/344        | Reference        |                                          | 691/631        | 2.82 (2.02-3.94) | $1.1 \times 10^{-9}$ |
| CC                                           | 47/40          | 1.49 (0.94-2.35) | 0.09                                     | 90/65          | 3.71 (2.35-5.86) | $1.9 \times 10^{-8}$ |
| $P_{\text{mult}}, P_{\text{mult}}^{\dagger}$ |                |                  | $4.1 \times 10^{-9}, 2.4 \times 10^{-8}$ |                |                  |                      |
| $P_{\text{add}}, P_{\text{add}}^{\dagger}$   |                |                  | 0.02, 0.14                               |                |                  |                      |

\*ORs and 95% CI were calculated by unconditional logistic regression after adjusting for sex and age;  $^{\dagger}P$  was modified by bonferroni correction for multiple comparisons. OR, odds ratio; CI, confidence interval;  $P_{\text{mult}}$ , *P* value for multiplicative interaction term;  $P_{\text{add}}$ , *P* value for additive interaction model.
