# Supplementary material for: TERT Polymorphism rs2853669 Influences on Lung Cancer Risk in the Korean Population
Source: PubMed Central journal article supplement — J Korean Med Sci. 2015 Sep 12;30(10):1423–8. doi: 10.3346/jkms.2015.30.10.1423 (PMC4575930; doi:10.3346/jkms.2015.30.10.1423), 2015-09-12
Supplement: jkms-30-1423-s003.pdf [file jkms-30-1423-s003.pdf]

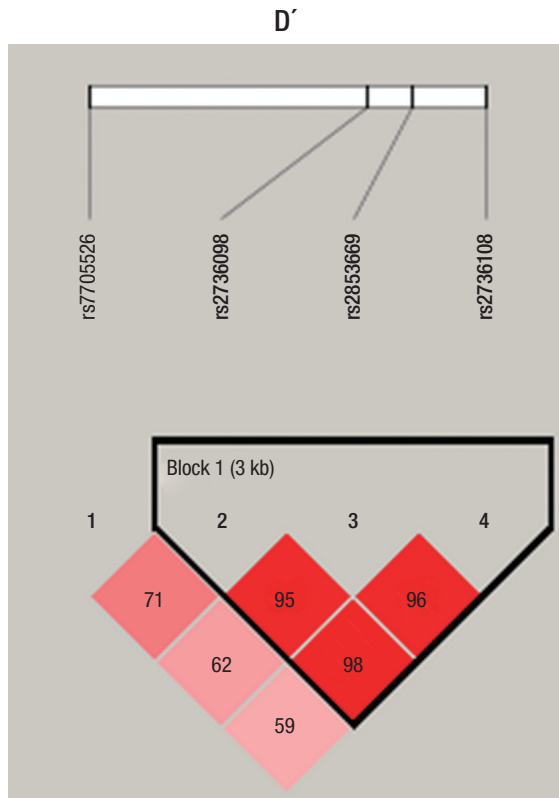

**Supplementary Figure 1.** Reconstructed LD plots of 4 polymorphisms in *TERT* using the study population. The plots were generated using the Haploview program and the method proposed by Gabriel et al. (31). The numbers in the squares are  $D'$  ( $\times 100$ ) values. The triangle indicates haplotype block.
